# Supplementary material for: Identification of the conserved domains of ADP-Glucose Pyrophosphorylase (AGPase) protein in sweetpotato (Ipomoea batatas (L.) Lam.) and its two wild relatives
Source: Research Square preprint supplement (doi:10.21203/rs.3.rs-277143/v1), 2021-03-08
Supplement: Supplementary file 1 [file a5a82f4db56fb1458ec56eb1.xlsx]

## Sheet: Sheet1
	Supplementary Table 1. Conserved domain prediction of the AGPase in the three species.
	Species	Accession No.	Amino acid	Conserved domain 1				Conserved domain 2
				ID	Name	Start	End	ID	Name	Start	End
	I.batatas	BAF47744.2	522	cd02508	ADP_Glucose_PP	103	352	cd04651	LbH_G1P_AT_C	390	516
	I.batatas	AFL55400.1	522	cd02508	ADP_Glucose_PP	103	352	cd04651	LbH_G1P_AT_C	390	516
	I.batatas	AAS66988.1	522	cd02508	ADP_Glucose_PP	103	352	cd04651	LbH_G1P_AT_C	390	516
	I.batatas	AAA19648.1	303	cd00761	Glyco_tranf_GTA_type	1	147	cd04651	LbH_G1P_AT_C	171	297
	I.batatas	CAA86726.1	302	cd00761	Glyco_tranf_GTA_type	1	146	cd04651	LbH_G1P_AT_C	170	296
	I.batatas	CAA58473.1	427	cd02508	ADP_Glucose_PP	1	257	cd04651	LbH_G1P_AT_C	295	421
	I.batatas	AFL55401.1	523	cd02508	ADP_Glucose_PP	104	353	cd04651	LbH_G1P_AT_C	391	517
	I.batatas	BAF47745.1	523	cd02508	ADP_Glucose_PP	104	353	cd04651	LbH_G1P_AT_C	391	517
	I.batatas	AAS66987.1	523	cd02508	ADP_Glucose_PP	104	353	cd04651	LbH_G1P_AT_C	391	517
	I.batatas	AFL55399.1	525	cd04181	NTP_transferase	93	307	cd04651	LbH_G1P_AT_C	393	519
	I.batatas	AGB85112.1	525	cd04181	NTP_transferase	93	307	cd04651	LbH_G1P_AT_C	393	519
	I.batatas	BAF47749.1	525	cd04181	NTP_transferase	93	307	cd04651	LbH_G1P_AT_C	393	519
	I.batatas	AFL55398.1	518	cd04181	NTP_transferase	88	363	cd04651	LbH_G1P_AT_C	386	512
	I.batatas	BAF47748.1	518	cd04181	NTP_transferase	88	363	cd04651	LbH_G1P_AT_C	386	512
	I.batatas	AGB85111.1	517	cd04181	NTP_transferase	87	362	cd04651	LbH_G1P_AT_C	385	511
	I.batatas	AFL55396.1	517	cd04181	NTP_transferase	87	362	cd04651	LbH_G1P_AT_C	385	511
	I.batatas	BAF47746.1	517	cd04181	NTP_transferase	87	362	cd04651	LbH_G1P_AT_C	385	511
	I.batatas	CAB52196.1	450	cd04181	NTP_transferase	20	295	cd04651	LbH_G1P_AT_C	318	444
	I.batatas	BAF47747.1	515	cd04181	NTP_transferase	85	360	cd04651	LbH_G1P_AT_C	383	509
	I.batatas	AFL55397.1	515	cd04181	NTP_transferase	85	360	cd04651	LbH_G1P_AT_C	383	509
	I.batatas	AGB85109.1	517	cd04181	NTP_transferase	87	362	cd04651	LbH_G1P_AT_C	385	511
	I.batatas	CAB55495.1	490	cd04181	NTP_transferase	60	335	cd04651	LbH_G1P_AT_C	358	484
	I.batatas	AGB85110.1	515	cd04181	NTP_transferase	85	360	cd04651	LbH_G1P_AT_C	383	509
	I.batatas	AAC21562.1	517	cd04181	NTP_transferase	87	362	cd04651	LbH_G1P_AT_C	385	511
	I.batatas	CAB55496.1	385	cd00761	Glyco_tranf_GTA_type	2	230	cd04651	LbH_G1P_AT_C	253	379
	I.batatas	CAB51610.1	306	cd00761	Glyco_tranf_GTA_type	1	151	cd04651	LbH_G1P_AT_C	174	300
	I.trifida	itf11g03360.t1	522	cd04181	NTP_transferase	94	367
	I.trifida	itf13g19620.t1	525	cd04181	NTP_transferase	94	371
	I.trifida	itf02g13930.t1	523	cd04181	NTP_transferase	95	368
	I.trifida	itf01g13780.t1	351	cd04181	NTP_transferase	243	299
	I.trifida	itf00g32520.t1	351	cd04181	NTP_transferase	127	182
	I.trifida	itf09g27040.t1	474	cd04181	NTP_transferase	56	322
	I.trifida	itf06g21950.t1	517	cd04181	NTP_transferase	86	363
	I.trifida	itf08g03850.t1	517	cd04181	NTP_transferase	86	363
	I.trifida	itf05g24300.t1	416	cd04181	NTP_transferase	11	205	pfam00132	Hexapep	297	329
	I.trifida	itf10g06320.t1	427	cd04181	NTP_transferase	109	161	pfam00118	Cpn60_TCP1	175	212
	I.triloba	itb02g09380.t1	523	cd04181	NTP_transferase	95	368
	I.triloba	itb11g03360.t1	522	cd04181	NTP_transferase	94	367
	I.triloba	itb13g23180.t1	266	cd04181	NTP_transferase	1	112
	I.triloba	itb09g31010.t1	475	cd04181	NTP_transferase	57	323
	I.triloba	itb06g20570.t1	517	cd04181	NTP_transferase	86	363
	I.triloba	itb08g03970.t1	517	cd04181	NTP_transferase	86	363
	I.triloba	itb09g17690.t1	165	cd04181	NTP_transferase	2	30	cd04181	NTP_transferase	38	85
	I.triloba	itb05g25020.t1	416	cd04181	NTP_transferase	11	205	pfam00132	Hexapep	297	329
	I.triloba	itb11g22920.t4	415	cd04181	NTP_transferase	10	211	pfam00132	Hexapep	300	328
